# Supplementary material for: Unveiling the electronic and structural consequences of removing two electrons from B12H122−
Source: Royal Society of Chemistry journal article supplement (doi:10.1039/d3dt02652c), 2023-01-01
Supplement: d3dt02652c2.pdf [file d3dt02652c2.pdf]

# Supporting Information

## Unveiling the Electronic and Structural Consequences of Removing Two Electrons from $B_{12}H_{12}^{2-}$

Gerardo Hernández-Juárez,<sup>1</sup> Alejandro Vásquez-Espinal,<sup>2</sup> Fernando Murillo,<sup>1</sup> Alan Quintal,<sup>1</sup>  
Filiberto Ortíz-Chi,<sup>3</sup> Ximena Zarate,<sup>4</sup> Jorge Barroso,<sup>1,5</sup> and Gabriel Merino.<sup>1,\*</sup>

<sup>1</sup> *Departamento de Física Aplicada, Centro de Investigación y de Estudios Avanzados,  
Unidad Mérida. Km 6 Antigua Carretera a Progreso. Apdo. Postal 73, Cordemex, 97310,  
Mérida, Yuc., México.*

<sup>2</sup> *Química y Farmacia, Facultad de Ciencias de la Salud, Universidad Arturo Prat, Casilla  
121, Iquique 1100000, Chile.*

<sup>3</sup> *CONACYT-División Académica de Ciencias Básicas, Universidad Juárez Autónoma de  
Tabasco, Cunduacán 86690, Tabasco, México.*

<sup>4</sup> *Instituto de Ciencias Químicas Aplicadas, Facultad de Ingeniería,  
Universidad Autónoma de Chile, Av. Pedro de Valdivia 425, Santiago, Chile*

<sup>5</sup> *Department of Chemistry, University of South Dakota, Vermillion, South Dakota 57069,  
United States*

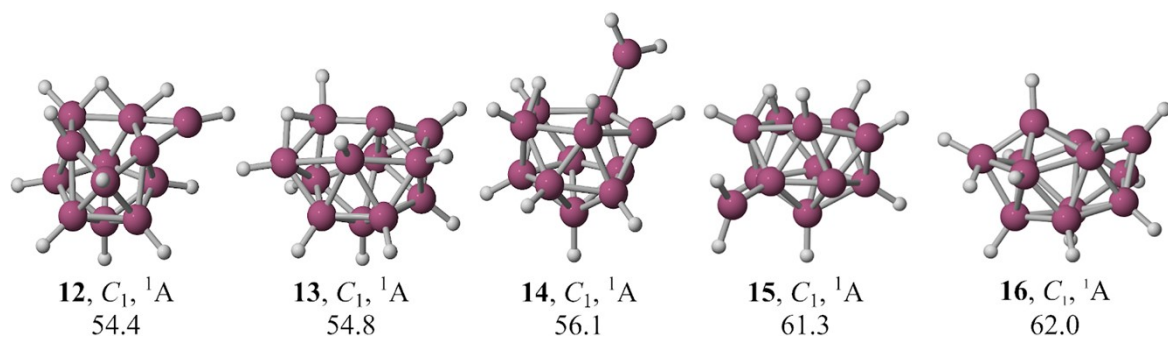

**Figure S1.** Higher-energy isomers of  $B_{12}H_{12}$ . Relative Gibbs free energies computed at the CCSD(T)/def2-TZVP//TPSS-D3/def2-TZVP level are in kcal/mol.

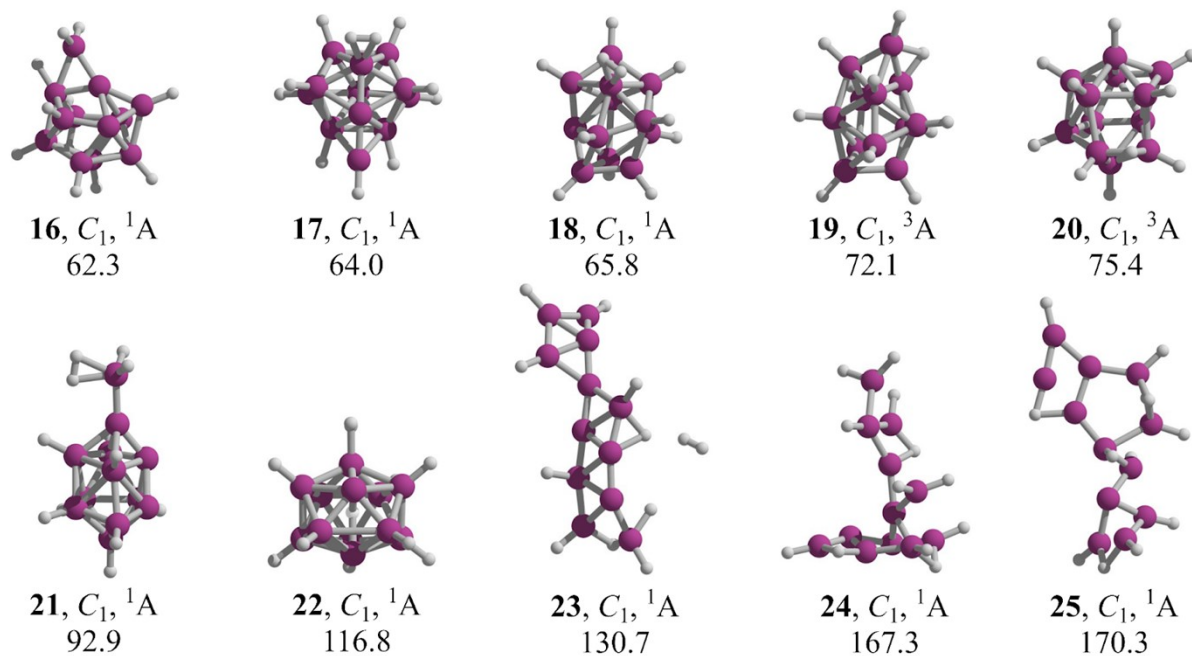

**Figure S2.** Higher-energy isomers of  $B_{12}H_{12}$  with relative Gibbs free energies above 60 kcal/mol computed at the TPSS-D3/def2-TZVP level.

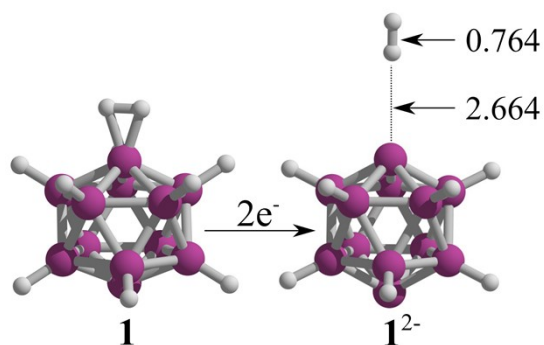

**Figure S3.** Structure of  $1^{2-}$  optimized from the geometry of **1** at the CCSD(T)/def2-TZVP//TPSS-D3/def2-TZVP level.

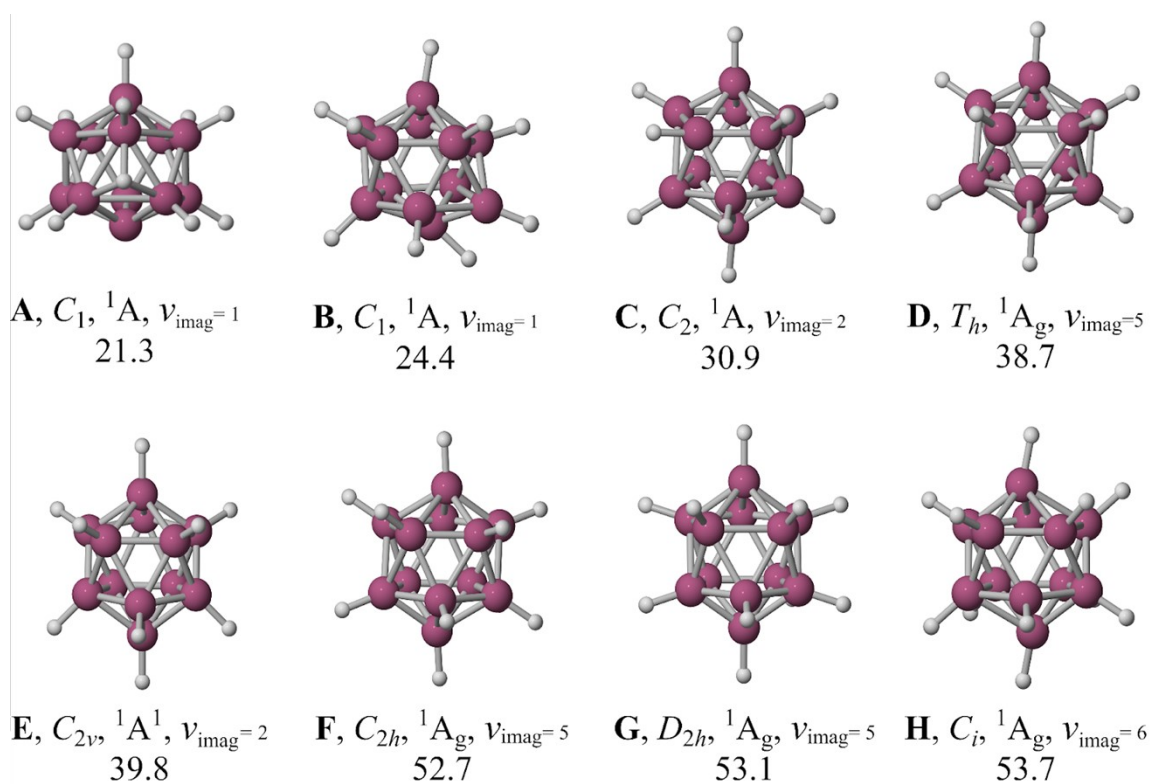

**Figure S4.** Some stationary points of  $B_{12}H_{12}$ .  $\nu$  is the number of imaginary frequencies. Relative Gibbs free energies computed at the CCSD(T)/def2-TZVP//TPSS-D3/def2-TZVP level are in kcal/mol.

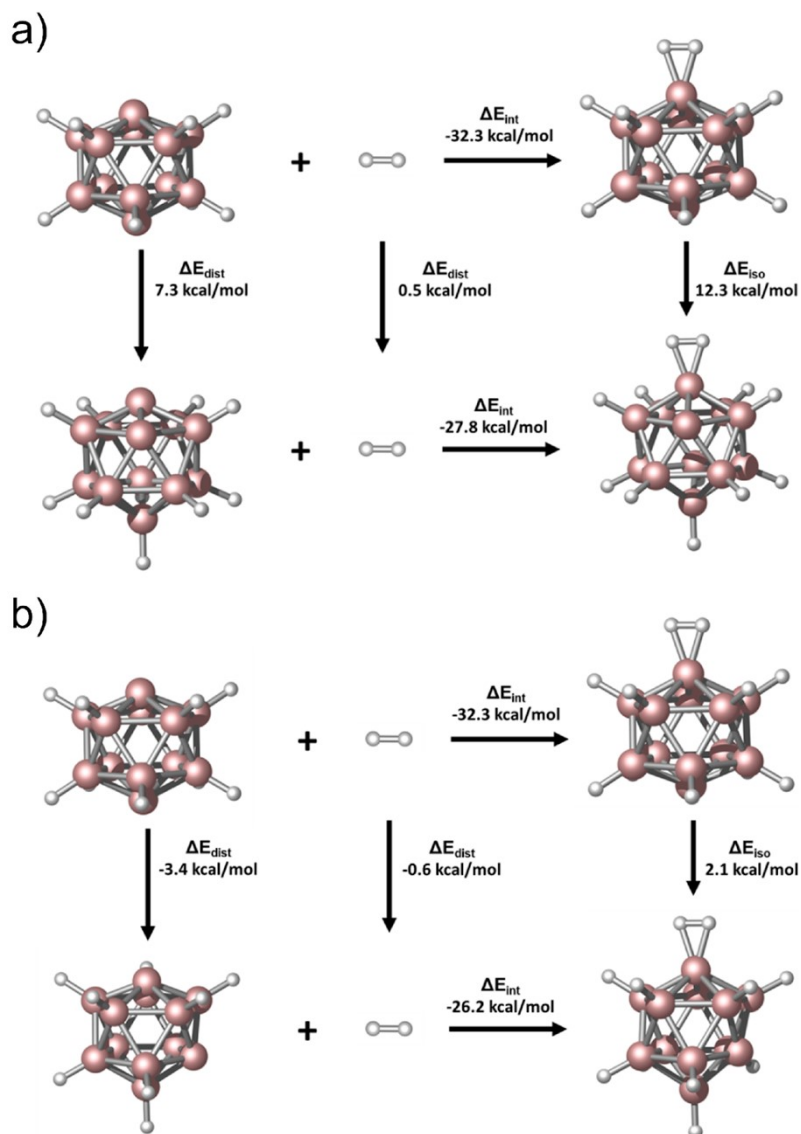

**Figure S5.** Energetic reaction cycle involving the isomerization between (a) the *para* and *ortho* and (b) the *para* and *meta* isomers.

**Table S1.** The HOMO-LUMO and energy gap ( $\Delta_{\text{H-L}}$ , eV) of the low-lying isomers of  $\text{B}_{12}\text{H}_{12}$  at the TPSS-D3/def2-TZVP level, in eV. The T1 diagnostic at the CCSD/cc-pVTZ level of theory is a measure of the significance of the multireference effects.

| Isomer | $E_{\text{HOMO}}$ | $E_{\text{LUMO}}$ | $\Delta_{\text{H-L}}$ | T1   |
|--------|-------------------|-------------------|-----------------------|------|
| 1      | -7.61             | -3.86             | 3.75                  | 0.01 |
| 2      | -7.57             | -4.02             | 3.55                  | 0.01 |
| 3      | -7.92             | -4.19             | 3.73                  | 0.01 |
| 4      | -7.89             | -4.11             | 3.78                  | 0.01 |
| 5      | -7.90             | -4.39             | 3.51                  | 0.01 |
| 6      | -7.91             | -4.34             | 3.57                  | 0.01 |

|           |       |       |      |      |
|-----------|-------|-------|------|------|
| <b>7</b>  | -7.57 | -4.42 | 3.15 | 0.01 |
| <b>8</b>  | -7.84 | -5.36 | 2.48 | 0.01 |
| <b>9</b>  | -7.95 | -5.14 | 2.81 | 0.02 |
| <b>10</b> | -7.67 | -5.03 | 2.65 | 0.02 |

**Table S2.** Gibbs free energies at the CCSD(T)/def2-TZVP//TPSS-D3/def2-TZVP and MP2/def2-TZVP level for the low-lying isomers of B<sub>12</sub>H<sub>12</sub>.

|           | MP2/def2-TZVP | CCSD(T)/def2-TZVP//TPSS-D3/def2-TZVP |
|-----------|---------------|--------------------------------------|
| <b>1</b>  | 0.0           | 0.0                                  |
| <b>2</b>  | 2.8           | 3.2                                  |
| <b>3</b>  | 5.2           | 5.7                                  |
| <b>4</b>  | 6.7           | 7.3                                  |
| <b>5</b>  | 8.0           | 8.4                                  |
| <b>6</b>  | 8.7           | 8.5                                  |
| <b>7</b>  | 12.9          | 13.9                                 |
| <b>8</b>  | 21.2          | 20.4                                 |
| <b>9</b>  | 20.3          | 21.3                                 |
| <b>10</b> | 19.0          | 23.5                                 |
| <b>11</b> | 48.2          | 40.3                                 |

### Cartesian Coordinates

**1**

CCSD(T)/def2-TZVP//TPSS/def2-TZVP

**G = -304.63101 a.u.**

|   |            |            |            |
|---|------------|------------|------------|
| H | -0.8078570 | -1.4369990 | 2.4675540  |
| B | -0.4837020 | -0.8432910 | 1.4940160  |
| B | 0.4766740  | 0.6561280  | 1.4869360  |
| H | 0.8018220  | 1.2458030  | 2.4642520  |
| B | -1.5692810 | -0.8268790 | -0.0000000 |

|   |            |            |            |
|---|------------|------------|------------|
| H | -2.6041520 | -1.4050080 | -0.0000000 |
| B | -1.2527840 | 0.6645250  | 0.9252160  |
| H | -2.0936090 | 1.2486430  | -1.5252270 |
| H | 0.4300080  | 2.7258760  | 0.0000000  |
| B | 0.0020490  | 1.4530520  | 0.0000000  |
| H | -0.4086070 | 2.7319080  | -0.0000000 |
| H | -2.0936090 | 1.2486430  | 1.5252270  |
| B | -1.2527840 | 0.6645250  | -0.9252160 |
| H | 2.1038220  | -1.4238510 | -1.5234330 |
| B | -0.4837020 | -0.8432910 | -1.4940160 |
| B | 1.2645730  | -0.8373920 | -0.9259870 |
| H | -0.8078570 | -1.4369990 | -2.4675540 |
| B | -0.0026410 | -1.4805800 | -0.0000000 |
| B | 1.2645730  | -0.8373920 | 0.9259870  |
| H | 2.1038220  | -1.4238510 | 1.5234330  |
| H | 0.8018220  | 1.2458030  | -2.4642520 |
| B | 0.4766740  | 0.6561280  | -1.4869360 |
| B | 1.5564280  | 0.6627730  | 0.0000000  |
| H | 2.5940200  | 1.2385040  | 0.0000000  |

2

**CCSD(T)/def2-TZVP//TPSS/def2-TZVP**

**G = -304.62582 a.u.**

|   |            |            |            |
|---|------------|------------|------------|
| H | -2.8030320 | 0.0043730  | -0.0000000 |
| B | -1.6160730 | 0.0470780  | -0.0000000 |
| B | -0.6281120 | -1.3863360 | -0.0000000 |
| H | -1.6116990 | -2.3255560 | -0.0000000 |
| B | -0.6898200 | 1.2653710  | 0.9074280  |
| H | -1.2192800 | 2.1247680  | 1.5307250  |
| B | -0.6898200 | -0.4308650 | 1.4803430  |
| H | 1.4176640  | 0.8161660  | 2.4719210  |
| H | 1.3906290  | -2.1024060 | 1.5303400  |
| B | 0.8363830  | -1.2322640 | 0.9466970  |
| H | -1.2366970 | -0.8154890 | 2.4615020  |
| B | 0.8272500  | 0.5083190  | 1.4907450  |
| H | 1.4176640  | 0.8161660  | -2.4719210 |
| B | 0.8268000  | 1.5765840  | 0.0000000  |
| B | 0.8272500  | 0.5083190  | -1.4907450 |
| H | 1.4060330  | 2.6108390  | 0.0000000  |
| B | -0.6898200 | 1.2653710  | -0.9074280 |
| B | -0.6898200 | -0.4308650 | -1.4803430 |
| H | -1.2366970 | -0.8154890 | -2.4615020 |
| B | 1.4874960  | 0.0194740  | 0.0000000  |

|   |            |            |            |
|---|------------|------------|------------|
| B | 0.8363830  | -1.2322640 | -0.9466970 |
| H | -1.2192800 | 2.1247680  | -1.5307250 |
| H | 1.3906290  | -2.1024060 | -1.5303400 |
| H | -0.8864190 | -2.7253460 | -0.0000000 |

3

**CCSD(T)/def2-TZVP//TPSS/def2-TZVP**

**G = -304.62200 a.u.**

|   |            |            |            |
|---|------------|------------|------------|
| B | 1.4885530  | 0.0042310  | 0.0000000  |
| H | 1.3874360  | -2.5929300 | 0.0000000  |
| H | 1.3982540  | -0.8161030 | 2.4678390  |
| B | -0.6668530 | -1.2444730 | -0.9749090 |
| B | -0.6668530 | -1.2444730 | 0.9749090  |
| B | 0.8422950  | -0.4553450 | 1.4861010  |
| H | -1.1844690 | -2.1048400 | -1.6078060 |
| H | -1.1844690 | -2.1048400 | 1.6078060  |
| B | 0.8148140  | -1.5556660 | 0.0000000  |
| H | 1.3982540  | -0.8161030 | -2.4678390 |
| B | 0.8422950  | -0.4553450 | -1.4861010 |
| B | 0.8422950  | 1.2676920  | 0.9268660  |
| H | 1.4107760  | 2.0980540  | 1.5524330  |
| B | -0.6816320 | 0.4916160  | 1.4674630  |
| H | -1.2164370 | 0.8245570  | 2.4718540  |
| H | -1.7097170 | -1.2922450 | 0.0000000  |
| H | -1.2133530 | 2.6032610  | -0.0000000 |
| B | 0.8422950  | 1.2676920  | -0.9268660 |
| B | -0.6404450 | 1.5657860  | -0.0000000 |
| H | 1.4107760  | 2.0980540  | -1.5524330 |
| B | -1.6284290 | 0.0883740  | -0.0000000 |
| H | -2.8141380 | 0.1700610  | -0.0000000 |
| H | -1.2164370 | 0.8245570  | -2.4718540 |
| B | -0.6816320 | 0.4916160  | -1.4674630 |

4

**CCSD(T)/def2-TZVP//TPSS/def2-TZVP**

**G = -304.61935 a.u.**

|   |           |            |           |
|---|-----------|------------|-----------|
| H | 1.9379990 | 1.6219310  | 1.5011390 |
| B | 1.1245180 | 0.9570470  | 0.9549080 |
| B | 0.5071380 | -0.5874640 | 1.5294730 |
| H | 0.9433310 | -1.1331350 | 2.4870920 |

|   |            |            |            |
|---|------------|------------|------------|
| B | 1.1245180  | 0.9570470  | -0.9549080 |
| H | 1.9379990  | 1.6219310  | -1.5011390 |
| B | 1.6153350  | -0.4804590 | -0.0000000 |
| H | 0.9433310  | -1.1331350 | -2.4870920 |
| H | 0.0976700  | -2.7898680 | -0.0000000 |
| B | 0.1572840  | -1.5946780 | -0.0000000 |
| H | 1.4537800  | -1.8131910 | -0.0000000 |
| H | 2.7823520  | -0.7339590 | -0.0000000 |
| B | 0.5071380  | -0.5874640 | -1.5294730 |
| H | -2.7690620 | 1.0250630  | 0.0000000  |
| B | -0.6017830 | 0.7933290  | -1.4975510 |
| B | -1.6536070 | 0.6254700  | 0.0000000  |
| H | -1.0056870 | 1.3554350  | -2.4595720 |
| B | -0.1838240 | 1.4654770  | 0.0000000  |
| B | -0.6017830 | 0.7933290  | 1.4975510  |
| H | -1.0056870 | 1.3554350  | 2.4595720  |
| H | -1.9324180 | -1.4848210 | -1.5119220 |
| B | -1.1425880 | -0.8115050 | -0.9401670 |
| B | -1.1425880 | -0.8115050 | 0.9401670  |
| H | -1.9324180 | -1.4848210 | 1.5119220  |

5

**CCSD(T)/def2-TZVP//TPSS/def2-TZVP**

**G = -304.61755 a.u.**

|   |            |            |            |
|---|------------|------------|------------|
| B | 1.4735490  | 0.0383610  | 0.0000000  |
| H | 1.4962180  | -2.5665810 | -0.0000000 |
| H | 1.3930330  | -0.8073650 | 2.4651170  |
| B | -0.7542200 | -1.1936300 | -0.9717520 |
| B | -0.7542200 | -1.1936300 | 0.9717520  |
| B | 0.8264120  | -0.4690860 | 1.4810700  |
| H | -1.2877970 | -2.0237490 | -1.6313250 |
| H | -1.2877970 | -2.0237490 | 1.6313250  |
| B | 0.8909900  | -1.5478950 | -0.0000000 |
| H | 1.3930330  | -0.8073650 | -2.4651170 |
| B | 0.8264120  | -0.4690860 | -1.4810700 |
| B | 0.8264120  | 1.2815910  | 0.9256300  |
| H | 1.4159130  | 2.1059290  | 1.5395230  |
| B | -0.6893230 | 0.5289980  | 1.4488060  |
| H | -1.2175340 | 0.7868730  | 2.4788940  |
| H | -0.4071030 | -2.1431490 | -0.0000000 |
| H | -1.2286290 | 2.6229010  | 0.0000000  |
| B | 0.8264120  | 1.2815910  | -0.9256300 |



|   |            |           |            |
|---|------------|-----------|------------|
| B | -0.6994390 | 1.5617900 | 0.0000000  |
| H | 1.4159130  | 2.1059290 | -1.5395230 |
| B | -1.6164450 | 0.0372390 | -0.0000000 |
| H | -2.8038090 | 0.0372670 | -0.0000000 |
| H | -1.2175340 | 0.7868730 | -2.4788940 |
| B | -0.6893230 | 0.5289980 | -1.4488060 |

6

**CCSD(T)/def2-TZVP//TPSS/def2-TZVP**

**G = -304.61744 a.u.**

|   |            |            |            |
|---|------------|------------|------------|
| H | -1.4215220 | 2.0369590  | 1.6370990  |
| B | -0.8260930 | 1.2301310  | 1.0045840  |
| B | 0.7200080  | 0.4390050  | 1.4629330  |
| H | 1.2423290  | 0.7790730  | 2.4720330  |
| B | -0.8260930 | 1.2301310  | -1.0045840 |
| H | -1.4215220 | 2.0369590  | -1.6370990 |
| B | 0.8099880  | 1.5070800  | 0.0000000  |
| H | 1.2423290  | 0.7790730  | -2.4720330 |
| H | 2.8012700  | -0.0277810 | -0.0000000 |
| B | 1.6150560  | -0.0700410 | -0.0000000 |
| H | 1.3936660  | 2.5412950  | 0.0000000  |
| H | -0.4128310 | 2.1728180  | 0.0000000  |
| B | 0.7200080  | 0.4390050  | -1.4629330 |
| H | -1.4556730 | -2.5824150 | -0.0000000 |
| B | -0.8020790 | -0.5266970 | -1.4813640 |
| B | -0.8414620 | -1.5686140 | -0.0000000 |
| H | -1.4121520 | -0.7668840 | -2.4691600 |
| B | -1.4697090 | 0.0007730  | 0.0000000  |
| B | -0.8020790 | -0.5266970 | 1.4813640  |
| H | -1.4121520 | -0.7668840 | 2.4691600  |
| H | 1.2126600  | -2.1293150 | -1.5395740 |
| B | 0.6943210  | -1.2713960 | -0.9057280 |
| B | 0.6943210  | -1.2713960 | 0.9057280  |
| H | 1.2126600  | -2.1293150 | 1.5395740  |

7

**CCSD(T)/def2-TZVP//TPSS/def2-TZVP**

**G = -304.60893 a.u.**

|   |           |           |           |
|---|-----------|-----------|-----------|
| B | 0.1357420 | 0.0000750 | 1.6277370 |
| H | 0.2363360 | 0.0000920 | 2.8123470 |

|   |            |            |            |
|---|------------|------------|------------|
| B | -1.1656410 | 0.9043130  | 0.8370720  |
| H | -2.0176180 | -1.5387320 | 1.3669380  |
| H | -2.6207410 | 0.4229320  | -1.1830230 |
| B | -1.4792320 | 0.0001530  | -0.6228410 |
| H | -2.6210490 | -0.4230310 | -1.1820060 |
| H | -2.0173170 | 1.5392600  | 1.3668360  |
| B | -1.1658160 | -0.9039730 | 0.8371500  |
| H | 0.8741960  | -2.4878670 | 1.1631370  |
| B | 0.5333220  | -1.4576280 | 0.6826080  |
| B | -0.4977750 | -1.4840190 | -0.7816110 |
| H | -0.9005530 | -2.4502770 | -1.3415480 |
| H | 2.0389610  | 1.5486080  | -1.5062420 |
| B | -0.4975360 | 1.4840620  | -0.7817220 |
| B | 1.2462340  | 0.9205400  | -0.8872850 |
| H | -0.9000140 | 2.4503690  | -1.3417870 |
| B | -0.0189190 | -0.0000910 | -1.4970850 |
| B | 1.2460970  | -0.9208750 | -0.8871670 |
| H | 2.0387300  | -1.5491180 | -1.5060670 |
| B | 1.5945120  | -0.0001180 | 0.6149240  |
| H | 2.6914440  | -0.0001790 | 1.0671140  |
| B | 0.5335940  | 1.4575880  | 0.6825000  |
| H | 0.8747080  | 2.4878050  | 1.1629060  |

8

**CCSD(T)/def2-TZVP//TPSS/def2-TZVP**

**G = -304.59357 a.u.**

|   |            |            |            |
|---|------------|------------|------------|
| B | 0.0000000  | 1.3980890  | 1.3966770  |
| B | -0.0000000 | -0.8880120 | -1.4916130 |
| B | -0.8916180 | 1.5452460  | -0.1005560 |
| B | 0.8916180  | 1.5452460  | -0.1005560 |
| B | 1.0260200  | -0.0000000 | 0.9819360  |
| B | -0.0000000 | -1.3980890 | 1.3966770  |
| B | -1.0260200 | 0.0000000  | 0.9819360  |
| B | -1.3814860 | 0.0000000  | -0.8024330 |
| B | -0.8916180 | -1.5452460 | -0.1005560 |
| B | 0.8916180  | -1.5452460 | -0.1005560 |
| B | 1.3814860  | -0.0000000 | -0.8024330 |
| B | 0.0000000  | 0.8880120  | -1.4916130 |
| H | 0.0000000  | 1.9436380  | 2.4408770  |
| H | -0.0000000 | -1.4945740 | -2.5112160 |
| H | -1.6872060 | 2.4269100  | -0.0811820 |
| H | 1.6872060  | 2.4269100  | -0.0811820 |

|   |            |            |            |
|---|------------|------------|------------|
| H | 1.7177430  | -0.0000000 | 1.9613360  |
| H | -0.0000000 | -1.9436380 | 2.4408770  |
| H | -1.7177430 | 0.0000000  | 1.9613360  |
| H | -2.5201040 | 0.0000000  | -1.1459100 |
| H | -1.6872060 | -2.4269100 | -0.0811820 |
| H | 1.6872060  | -2.4269100 | -0.0811820 |
| H | 2.5201040  | -0.0000000 | -1.1459100 |
| H | 0.0000000  | 1.4945740  | -2.5112160 |

9

**CCSD(T)/def2-TZVP//TPSS/def2-TZVP**

**G = -304.59710 a.u.**

|   |            |            |            |
|---|------------|------------|------------|
| H | -1.0695000 | 2.2444460  | 1.6453560  |
| B | -0.6137240 | 1.3530780  | 1.0112760  |
| B | 0.7936380  | 0.3394630  | 1.4580240  |
| H | 1.2876020  | 0.6759980  | 2.4835570  |
| B | -0.6137240 | 1.3530780  | -1.0112760 |
| H | -1.0695000 | 2.2444460  | -1.6453560 |
| B | 0.8702500  | 1.4369960  | 0.0000000  |
| H | 1.2876020  | 0.6759980  | -2.4835570 |
| H | 2.7965330  | -0.2369650 | -0.0000000 |
| B | 1.6063110  | -0.1836740 | -0.0000000 |
| H | 1.4835510  | 2.4531470  | 0.0000000  |
| H | -1.6820420 | 1.4708210  | 0.0000000  |
| B | 0.7936380  | 0.3394630  | -1.4580240 |
| H | -1.6739580 | -2.4306040 | -0.0000000 |
| B | -0.8449860 | -0.4229370 | -1.4833300 |
| B | -0.9415130 | -1.4974180 | -0.0000000 |
| H | -1.4691350 | -0.6617040 | -2.4628110 |
| B | -1.4647060 | 0.1218020  | 0.0000000  |
| B | -0.8449860 | -0.4229370 | 1.4833300  |
| H | -1.4691350 | -0.6617040 | 2.4628110  |
| H | 1.0053860  | -2.2422070 | -1.5421110 |
| B | 0.5866220  | -1.3374040 | -0.8998250 |
| B | 0.5866220  | -1.3374040 | 0.8998250  |
| H | 1.0053860  | -2.2422070 | 1.5421110  |

10

**CCSD(T)/def2-TZVP//TPSS/def2-TZVP**

**G = -304.59842 a.u.**

|   |            |            |            |
|---|------------|------------|------------|
| B | 0.9262640  | -1.4293060 | 0.0000000  |
| B | 1.4777690  | 0.0009060  | 0.9331500  |
| H | 1.5713030  | -2.4248390 | 0.0000000  |
| H | 2.5230040  | 0.1007420  | 1.4859660  |
| H | 0.0328970  | -1.5788560 | 2.4626080  |
| B | 0.0445830  | -0.9270670 | 1.4721250  |
| B | -0.8516800 | -1.3533260 | 0.0000000  |
| H | -1.6177790 | -2.2689120 | 0.0000000  |
| H | -2.4306730 | 0.1644540  | 1.4938440  |
| B | -1.3805770 | 0.0311550  | 0.9567890  |
| H | 0.0762470  | 1.5760310  | 2.5132710  |
| B | 0.0445830  | 0.8377740  | 1.5881260  |
| H | -2.4306730 | 0.1644540  | -1.4938440 |
| B | -1.3805770 | 0.0311550  | -0.9567890 |
| B | -0.9457620 | 1.5378090  | -0.0000000 |
| B | 0.7509890  | 1.2313860  | -0.0000000 |
| B | 0.0445830  | 0.8377740  | -1.5881260 |
| B | 0.0445830  | -0.9270670 | -1.4721250 |
| B | 1.4777690  | 0.0009060  | -0.9331500 |
| H | 0.0328970  | -1.5788560 | -2.4626080 |
| H | -1.7353200 | 2.4210830  | -0.0000000 |
| H | 0.0762470  | 1.5760310  | -2.5132710 |
| H | 0.1161990  | 2.3874290  | -0.0000000 |
| H | 2.5230040  | 0.1007420  | -1.4859660 |

11

**CCSD(T)/def2-TZVP//TPSS/def2-TZVP**  
**G = -304.56681 a.u.**

|   |            |            |            |
|---|------------|------------|------------|
| B | 0.4331140  | 1.5115830  | 0.7658430  |
| B | 0.0471630  | -0.0326470 | 1.7472420  |
| H | 0.7901700  | 2.4912030  | 1.3252260  |
| H | 0.0229720  | 0.0109480  | 2.9294090  |
| H | 2.5417920  | 0.2673130  | 1.2887210  |
| B | 1.4994830  | 0.0247330  | 0.7528630  |
| B | 1.2075210  | 0.8730850  | -0.7710450 |
| H | 2.0066040  | 1.3754280  | -1.5070110 |
| H | 2.0953450  | -1.6406350 | -1.0506120 |
| B | 1.2155350  | -0.8947800 | -0.7303170 |
| H | 0.7853720  | -2.4999650 | 1.3079090  |
| B | 0.4437540  | -1.4762650 | 0.8227130  |
| H | -0.0229720 | 0.0109480  | -2.9294090 |
| B | -0.0471630 | -0.0326470 | -1.7472420 |

|   |            |            |            |
|---|------------|------------|------------|
| B | -0.4437540 | -1.4762650 | -0.8227130 |
| B | -1.2155350 | -0.8947800 | 0.7303170  |
| B | -1.4994830 | 0.0247340  | -0.7528630 |
| B | -0.4331140 | 1.5115830  | -0.7658430 |
| B | -1.2075210 | 0.8730850  | 0.7710450  |
| H | -0.7901690 | 2.4912040  | -1.3252260 |
| H | -0.7853710 | -2.4999650 | -1.3079100 |
| H | -2.5417930 | 0.2673120  | -1.2887210 |
| H | -2.0953450 | -1.6406360 | 1.0506110  |
| H | -2.0066040 | 1.3754290  | 1.5070110  |

12

**CCSD(T)/def2-TZVP//TPSS/def2-TZVP**

**G = -304.54410 a.u.**

|   |            |            |            |
|---|------------|------------|------------|
| B | -2.3468310 | -0.6658680 | -0.3092650 |
| B | -0.8311850 | -0.9820860 | -0.5816160 |
| B | 0.6615450  | -1.6147370 | -0.9559810 |
| H | 0.8843240  | -2.4933220 | -1.7162260 |
| H | 0.2317870  | 2.7822460  | -1.4334090 |
| B | -1.2791370 | 0.8093210  | -0.3402760 |
| B | 0.0680260  | 1.7608930  | -0.8574600 |
| H | -2.5310690 | 0.8517120  | -0.4560560 |
| H | -0.9983390 | 1.3475810  | -1.5072350 |
| B | 0.7804750  | 0.0749060  | -1.3103570 |
| H | 0.8928570  | 0.1856560  | -2.4919660 |
| B | 1.3533670  | 1.0679320  | 0.0799960  |
| H | 2.3032490  | 1.7777160  | 0.0392750  |
| B | -0.1846120 | 1.4590830  | 0.9132530  |
| H | 1.2468540  | 0.1124680  | 2.5307980  |
| H | -3.4437700 | -0.8824210 | 0.0669930  |
| B | -0.8925300 | -0.1920280 | 1.0918090  |
| H | -1.7977490 | -0.3145770 | 1.8631250  |
| H | -0.4162430 | 2.3530470  | 1.6568620  |
| B | 0.8164750  | 0.0637440  | 1.4267270  |
| H | 2.8675810  | -0.9535370 | 0.1295360  |
| B | 1.7080060  | -0.7104890 | 0.0612150  |
| B | 0.2670100  | -1.5237780 | 0.7606950  |
| H | 0.1574680  | -2.5010300 | 1.4246010  |

13

**CCSD(T)/def2-TZVP//TPSS/def2-TZVP**

**$G = -304.54368$  a.u.**

|   |            |            |            |
|---|------------|------------|------------|
| B | -1.2742920 | -0.1946520 | 1.1589890  |
| H | -1.9477120 | -0.3317590 | 2.1270600  |
| H | 0.5916300  | 2.5309200  | -0.9544490 |
| H | 2.8479770  | -1.7273960 | 0.2589200  |
| B | 1.6524220  | 0.6139790  | 0.5966430  |
| B | 0.4854370  | 1.4453670  | -0.4806270 |
| H | 2.5515790  | 1.1644850  | 1.1446640  |
| B | 1.9197430  | -1.0170850 | 0.0828830  |
| B | 0.5229310  | -1.1423630 | -0.6376400 |
| H | -3.3541060 | 0.0001330  | -0.5383460 |
| B | -2.1920580 | -0.1815950 | -0.3988050 |
| H | -1.9082460 | 2.1493170  | -0.1090270 |
| B | -0.4274420 | 0.1274780  | -1.4049880 |
| H | -0.6992130 | 0.0712420  | -2.5574400 |
| B | -1.2052720 | 1.1965190  | -0.0455060 |
| B | 0.4968280  | -0.7543760 | 1.1879930  |
| H | 0.6446530  | -1.4994120 | 2.1000150  |
| B | 1.5127100  | 0.2027580  | -1.1556860 |
| H | 2.1841060  | 0.3824410  | -2.1135640 |
| H | -1.0210630 | -2.6188780 | -0.1686330 |
| B | 0.0024910  | 1.0074250  | 1.1959360  |
| B | -1.0557380 | -1.4164250 | -0.1566590 |
| H | -0.0032600 | 1.7408180  | 2.1284310  |
| H | -2.0751460 | -1.2970640 | -1.0303010 |

**14**

**CCSD(T)/def2-TZVP//TPSS/def2-TZVP**

**$G = -304.54433$  a.u.**

|   |            |            |            |
|---|------------|------------|------------|
| H | -3.6957070 | -0.1385230 | -0.7269710 |
| H | -2.0683130 | 2.1744650  | 0.2159070  |
| B | -1.1557800 | 1.4487630  | 0.0048960  |
| B | -2.8275120 | -0.3947120 | 0.0537040  |
| B | -0.0838910 | 0.8137810  | 1.2507740  |
| H | -0.6233490 | 1.0324780  | 2.2891260  |
| H | -0.5509260 | -2.9016220 | -0.0778470 |
| H | 0.9788800  | -1.3679330 | 2.4323170  |
| B | -1.2425800 | -0.2455220 | -0.3794280 |
| B | 0.6599380  | -0.9490790 | 1.3691160  |
| H | -3.1176480 | -0.7224300 | 1.1651940  |
| H | -0.5585490 | -1.4351810 | 1.2549980  |

|   |            |            |            |
|---|------------|------------|------------|
| B | -0.1630570 | -1.7903930 | 0.0466940  |
| B | 1.4843450  | -1.1285940 | -0.1959200 |
| H | 2.2767710  | 0.7551590  | -1.8074370 |
| B | 0.1713420  | -0.8004140 | -1.3666100 |
| H | 2.4034380  | -1.8550550 | -0.3788700 |
| H | -0.0297900 | -1.3692820 | -2.3907550 |
| B | 1.4372210  | 0.4467620  | -1.0296670 |
| B | -0.2151200 | 0.8417740  | -1.1607960 |
| B | 0.6670400  | 1.7830000  | -0.0161090 |
| H | 1.0768840  | 2.8921470  | -0.0658740 |
| B | 1.5504240  | 0.4276420  | 0.7552160  |
| H | 2.4964610  | 0.6707450  | 1.4308610  |

15

**CCSD(T)/def2-TZVP//TPSS/def2-TZVP**

**$G = -304.53493$  a.u.**

|   |            |            |            |
|---|------------|------------|------------|
| B | -0.0197340 | -1.3358100 | 0.3730130  |
| H | 0.3552110  | -0.2054800 | 2.6578570  |
| H | 3.4647860  | -0.6351860 | 1.3013450  |
| B | -1.1823530 | 0.9922490  | 0.7945530  |
| B | 0.5947960  | 1.3564200  | 0.6235100  |
| B | 2.8890180  | -0.7061810 | 0.2544090  |
| H | -1.9113350 | 1.7561600  | 1.3381880  |
| H | 1.1773350  | 2.2201300  | 1.1902260  |
| B | 0.0599810  | -0.0658210 | 1.5177860  |
| H | -2.3223560 | -1.1709010 | 1.7356410  |
| B | -1.5422600 | -0.7569860 | 0.9478540  |
| B | 1.2640770  | -0.2654340 | 0.1608810  |
| H | 3.4973880  | -1.0755050 | -0.7066140 |
| B | 1.0174700  | 0.9350540  | -1.0659540 |
| H | 1.9075840  | 1.2893150  | -1.7642610 |
| B | -0.5552330 | 1.6518180  | -0.6971940 |
| H | 0.4644090  | -1.1955970 | -2.3171070 |
| B | -1.2622070 | -1.5977750 | -0.6339680 |
| B | 0.1898870  | -0.8138840 | -1.2295250 |
| H | -1.8364490 | -2.4555820 | -1.2063050 |
| H | -0.0471190 | 1.1979000  | -1.8184820 |
| H | -1.0240220 | 2.6795880  | -1.0621590 |
| H | -2.5759120 | 0.2469220  | -1.4032130 |
| B | -1.6833450 | 0.0759970  | -0.6343890 |

16

**CCSD(T)/def2-TZVP//TPSS/def2-TZVP**

**$G = -304.53102$  a.u.**

|   |            |            |            |
|---|------------|------------|------------|
| H | -2.6880180 | -1.6608020 | -1.0443280 |
| B | -2.0197450 | -0.7916020 | -0.6070690 |
| B | 0.8314230  | -0.8609970 | -1.1178650 |
| H | 0.9169860  | -1.6187720 | -2.0261440 |
| H | 0.9470590  | 1.8396570  | -1.8115960 |
| B | -2.0095880 | 0.8429730  | -0.5330380 |
| B | 0.8331860  | 0.9880800  | -0.9955970 |
| H | -2.6635970 | 1.7593120  | -0.8875300 |
| B | -0.5983050 | 0.0416220  | -1.0362170 |
| B | 2.2122450  | 0.0289890  | -0.5484340 |
| H | 3.1625640  | 0.1311970  | -1.2535210 |
| B | -1.5836350 | -0.0687790 | 0.9588520  |
| H | -2.3009440 | -0.1440560 | 1.9052070  |
| B | -0.4751100 | -1.3134720 | 0.2386400  |
| H | 0.1177350  | -0.1567860 | 2.7075370  |
| H | 2.7293390  | -0.2764780 | 0.5354190  |
| B | 1.3519570  | -0.9857230 | 0.6305690  |
| H | 1.8517060  | -1.8406760 | 1.2857080  |
| H | -0.5610580 | -2.4908680 | 0.3623390  |
| B | 0.1141470  | -0.0737240 | 1.5241360  |
| H | -0.6237150 | 2.4420970  | 0.6091460  |
| B | -0.4812350 | 1.2833690  | 0.3843470  |
| B | 1.2656040  | 0.9725670  | 0.7410920  |
| H | 1.9072230  | 1.6996530  | 1.4206810  |

**TS<sub>8-6</sub>**

**CCSD(T)/def2-TZVP//TPSS/def2-TZVP**

**$G = -304.59697$  a.u.**

**$\nu = 504.0i$  cm<sup>-1</sup>**

|   |            |            |            |
|---|------------|------------|------------|
| H | -1.1674070 | 2.1482650  | 1.6740220  |
| B | -0.6802530 | 1.3197460  | 0.9749130  |
| B | 0.7797110  | 0.3919530  | 1.4454570  |
| H | 1.2459270  | 0.7333320  | 2.4805400  |
| B | -0.6802530 | 1.3197460  | -0.9749130 |
| H | -1.1674070 | 2.1482650  | -1.6740220 |
| B | 0.8449080  | 1.4709130  | -0.0000000 |
| H | 1.2459270  | 0.7333320  | -2.4805400 |
| H | 2.8123100  | -0.1797570 | -0.0000000 |



|   |            |            |            |
|---|------------|------------|------------|
| B | 1.6245940  | -0.1205310 | -0.0000000 |
| H | 1.4124070  | 2.5118910  | -0.0000000 |
| H | -1.6118410 | 1.6296480  | -0.0000000 |
| B | 0.7797110  | 0.3919530  | -1.4454570 |
| H | -1.5336460 | -2.5488420 | 0.0000000  |
| B | -0.8470440 | -0.4564260 | -1.4731220 |
| B | -0.8763120 | -1.5631710 | 0.0000000  |
| H | -1.4400300 | -0.7044190 | -2.4681940 |
| B | -1.4745840 | 0.0250950  | 0.0000000  |
| B | -0.8470440 | -0.4564260 | 1.4731220  |
| H | -1.4400300 | -0.7044190 | 2.4681940  |
| H | 1.0859590  | -2.1787700 | -1.5628110 |
| B | 0.6354700  | -1.3024020 | -0.9029400 |
| B | 0.6354700  | -1.3024020 | 0.9029400  |
| H | 1.0859590  | -2.1787700 | 1.5628110  |

**TS<sub>6-5</sub>**

**CCSD(T)/def2-TZVP//TPSS/def2-TZVP**

**G = -304.61178**

**v = 318.4i cm<sup>-1</sup>**

|   |            |            |            |
|---|------------|------------|------------|
| B | -0.0711340 | 0.1191790  | -1.4527780 |
| H | 2.4592900  | -0.1260250 | -1.6343430 |
| H | 0.8570720  | 2.5437560  | -1.2720660 |
| B | 1.1560640  | -1.0868020 | 0.6588300  |
| B | 1.2643250  | 0.8186480  | 0.7565800  |
| B | 0.4410660  | 1.5592280  | -0.7635710 |
| H | 2.0612070  | -1.7180970 | 1.0892820  |
| H | 2.0594920  | 1.4249040  | 1.4110030  |
| B | 1.5237920  | -0.0470280 | -0.9004370 |
| H | 0.6846100  | -2.3692770 | -1.5833510 |
| B | 0.3826110  | -1.4564670 | -0.8892100 |
| B | -1.2897980 | 1.0260580  | -0.7181990 |
| H | -2.1274880 | 1.6848880  | -1.2359870 |
| B | -0.4219990 | 1.4332430  | 0.7774360  |
| H | -0.6113780 | 2.4152620  | 1.4144830  |
| H | 2.3107880  | 0.4907790  | 0.0357950  |
| H | -2.5575580 | 0.0453720  | 1.3304240  |
| B | -1.3322350 | -0.8145500 | -0.8441500 |
| B | -1.5213230 | 0.0220210  | 0.7537450  |
| H | -2.1989530 | -1.3420350 | -1.4564350 |
| B | 0.0334700  | -0.1451570 | 1.6064540  |
| H | 0.0721380  | -0.1668890 | 2.7923270  |

|   |            |            |           |
|---|------------|------------|-----------|
| H | -0.9512960 | -2.5253950 | 1.0831300 |
| B | -0.5764230 | -1.4998210 | 0.6204490 |

**TS<sub>5-3</sub>**

**CCSD(T)/def2-TZVP//TPSS/def2-TZVP**

**G = -304.61410**

**v = 229.8i cm<sup>-1</sup>**

|   |            |            |            |
|---|------------|------------|------------|
| B | 1.5105690  | 0.0376200  | 0.0000000  |
| H | 1.4084040  | -2.6051450 | 0.0000000  |
| H | 1.3669820  | -0.8184930 | 2.4685300  |
| B | -0.7138390 | -1.2055100 | -0.9392090 |
| B | -0.7138390 | -1.2055100 | 0.9392090  |
| B | 0.8427030  | -0.4860080 | 1.4599330  |
| H | -1.2093300 | -1.9941990 | -1.6872200 |
| H | -1.2093300 | -1.9941990 | 1.6872200  |
| B | 0.9086280  | -1.5328120 | 0.0000000  |
| H | 1.3669820  | -0.8184930 | -2.4685300 |
| B | 0.8427030  | -0.4860080 | -1.4599330 |
| B | 0.8245780  | 1.2705850  | 0.9238410  |
| H | 1.4015630  | 2.0803190  | 1.5697350  |
| B | -0.7138390 | 0.5205430  | 1.4369740  |
| H | -1.2198420 | 0.7800410  | 2.4767890  |
| H | -1.0379830 | -2.0916400 | 0.0000000  |
| H | -1.1875690 | 2.6573820  | -0.0000000 |
| B | 0.8245780  | 1.2705850  | -0.9238410 |
| B | -0.6820440 | 1.5848580  | -0.0000000 |
| H | 1.4015630  | 2.0803190  | -1.5697350 |
| B | -1.6264080 | 0.0953960  | -0.0000000 |
| H | -2.8113620 | 0.0226560  | -0.0000000 |
| H | -1.2198420 | 0.7800410  | -2.4767890 |
| B | -0.7138390 | 0.5205430  | -1.4369740 |

**TS<sub>3-1</sub>**

**CCSD(T)/def2-TZVP//TPSS/def2-TZVP**

**G = -304.61682**

**v = 925.4i cm<sup>-1</sup>**

|   |           |            |           |
|---|-----------|------------|-----------|
| H | 2.5331790 | 0.0541120  | 1.5086310 |
| B | 1.4946640 | 0.0368990  | 0.9387060 |
| B | 0.0369380 | -0.7839260 | 1.5082830 |
| H | 0.0163840 | -1.4769670 | 2.4708440 |

|   |            |            |            |
|---|------------|------------|------------|
| B | 1.4946640  | 0.0368990  | -0.9387060 |
| H | 2.5331790  | 0.0541120  | -1.5086310 |
| B | 0.9372200  | -1.3949280 | -0.0000000 |
| H | 0.0163840  | -1.4769670 | -2.4708440 |
| H | -1.5800090 | -2.2540010 | -0.0000000 |
| B | -0.8339620 | -1.2709560 | -0.0000000 |
| H | -0.3736350 | -2.4325200 | -0.0000000 |
| H | 1.5802210  | -2.3963340 | -0.0000000 |
| B | 0.0369380  | -0.7839260 | -1.5082830 |
| H | -1.4927590 | 2.5473910  | 0.0000000  |
| B | 0.0369380  | 0.9857490  | -1.4960210 |
| B | -0.8960640 | 1.5233880  | 0.0000000  |
| H | 0.0762240  | 1.6713400  | -2.4621220 |
| B | 0.7817910  | 1.2541940  | 0.0000000  |
| B | 0.0369380  | 0.9857490  | 1.4960210  |
| H | 0.0762240  | 1.6713400  | 2.4621220  |
| H | -2.4426350 | 0.0691580  | -1.5290070 |
| B | -1.4130450 | 0.0954470  | -0.9437730 |
| B | -1.4130450 | 0.0954470  | 0.9437730  |
| H | -2.4426350 | 0.0691580  | 1.5290070  |

1-

**CCSD(T)/def2-TZVP//TPSS/def2-TZVP**  
**G = -304.65785 a.u.**

|   |            |            |            |
|---|------------|------------|------------|
| H | -1.5378740 | 2.1167020  | 1.3988040  |
| B | -0.8911930 | 1.2266210  | 0.9136500  |
| B | -0.0000000 | 1.5154050  | -0.6522100 |
| H | -0.0000000 | 2.6159960  | -1.1364960 |
| B | -1.4419800 | -0.4685280 | 0.9136500  |
| H | -2.4883320 | -0.8085080 | 1.3988040  |
| B | -1.4412360 | 0.4682860  | -0.6522100 |
| H | -1.5376440 | -2.1163860 | -1.1364960 |
| H | 0.0000000  | 0.0000000  | -4.1856090 |
| B | 0.0000000  | 0.0000000  | -1.5213440 |
| H | 0.0000000  | 0.0000000  | -4.9497240 |
| H | -2.4879600 | 0.8083870  | -1.1364960 |
| B | -0.8907330 | -1.2259880 | -0.6522100 |
| H | 2.4883320  | -0.8085080 | 1.3988040  |
| B | -0.0000000 | -1.5161870 | 0.9136500  |
| B | 1.4419800  | -0.4685280 | 0.9136500  |
| H | -0.0000000 | -2.6163870 | 1.3988040  |
| B | 0.0000000  | 0.0000000  | 1.7789070  |
| B | 0.8911930  | 1.2266210  | 0.9136500  |
| H | 1.5378740  | 2.1167020  | 1.3988040  |
| H | 1.5376440  | -2.1163860 | -1.1364960 |

|   |           |            |            |
|---|-----------|------------|------------|
| B | 0.8907330 | -1.2259880 | -0.6522100 |
| B | 1.4412360 | 0.4682860  | -0.6522100 |
| H | 2.4879600 | 0.8083870  | -1.1364960 |

**B<sub>12</sub>H<sub>12</sub><sup>2-</sup>, I<sub>h</sub>**

**CCSD(T)/def2-TZVP//TPSS/def2-TZVP**

**G = -304.79964 a.u.**

|   |              |              |              |
|---|--------------|--------------|--------------|
| B | 0.000000000  | 0.000000000  | 1.700239000  |
| B | -1.446309000 | 0.469934000  | 0.760370000  |
| H | 0.000000000  | 0.000000000  | 2.905667000  |
| H | -2.471708000 | 0.803107000  | 1.299454000  |
| H | -1.527600000 | -2.102561000 | 1.299454000  |
| B | -0.893868000 | -1.230304000 | 0.760370000  |
| B | 0.893868000  | -1.230304000 | 0.760370000  |
| H | 1.527600000  | -2.102561000 | 1.299454000  |
| H | -0.000000000 | -2.598908000 | -1.299454000 |
| B | -0.000000000 | -1.520740000 | -0.760370000 |
| H | -2.471708000 | -0.803107000 | -1.299454000 |
| B | -1.446309000 | -0.469934000 | -0.760370000 |
| H | 2.471708000  | -0.803107000 | -1.299454000 |
| B | 1.446309000  | -0.469934000 | -0.760370000 |
| B | 0.000000000  | -0.000000000 | -1.700239000 |
| B | -0.893868000 | 1.230304000  | -0.760370000 |
| B | 0.893868000  | 1.230304000  | -0.760370000 |
| B | 1.446309000  | 0.469934000  | 0.760370000  |
| B | 0.000000000  | 1.520740000  | 0.760370000  |
| H | 2.471708000  | 0.803107000  | 1.299454000  |
| H | 0.000000000  | -0.000000000 | -2.905667000 |
| H | 1.527600000  | 2.102561000  | -1.299454000 |
| H | -1.527600000 | 2.102561000  | -1.299454000 |
| H | 0.000000000  | 2.598908000  | 1.299454000  |

**A**

**CCSD(T)/def2-TZVP//TPSS/def2-TZVP**

**G = -304.59708 a.u.**

|   |            |            |            |
|---|------------|------------|------------|
| H | 0.0476130  | 2.8711210  | -0.8144250 |
| B | 0.0258160  | 1.7172440  | -0.5454570 |
| B | -0.9348010 | 1.1020040  | 0.8705640  |
| H | -1.4770550 | 2.0031030  | 1.4207280  |
| B | 1.6400360  | 0.4537370  | -0.6093590 |
| H | 2.6185310  | 0.8555400  | -1.1394850 |
| B | 0.9345850  | 1.0654020  | 0.8860200  |
| H | 2.3954860  | -1.1091340 | 1.2205090  |
| H | -0.0614370 | -0.2825010 | 2.7820240  |

|   |            |            |            |
|---|------------|------------|------------|
| B | -0.0609160 | -0.2317260 | 1.5903960  |
| H | 1.5290010  | 1.8793620  | 1.5137960  |
| H | 0.5929790  | 1.3567330  | -1.7716780 |
| B | 1.3999730  | -0.6867330 | 0.7312030  |
| H | -1.5136910 | -1.8091260 | -1.7503050 |
| B | 0.9037680  | -1.1680290 | -0.9348320 |
| B | -0.9464490 | -1.1070740 | -0.9799030 |
| H | 1.4772050  | -1.9254400 | -1.6455230 |
| B | 0.0370540  | 0.2060680  | -1.4443110 |
| B | -1.4952840 | 0.5971550  | -0.7467620 |
| H | -2.4159870 | 1.0565390  | -1.3349230 |
| H | -0.1305010 | -2.7685590 | 0.8364010  |
| B | -0.0868830 | -1.6343960 | 0.4922300  |
| B | -1.5189540 | -0.5555610 | 0.6131070  |
| H | -2.5518730 | -0.9180960 | 1.0684050  |

**B**

**CCSD(T)/def2-TZVP//TPSS/def2-TZVP**

**$G = -304.59217$  a.u.**

|   |            |            |            |
|---|------------|------------|------------|
| B | 1.2650900  | 1.4309290  | -0.2624600 |
| B | -0.9164810 | -1.4430220 | 0.1984840  |
| B | 1.5568270  | -0.2806410 | -0.8358350 |
| B | 1.5014540  | 0.0420670  | 0.8887350  |
| B | -0.0407030 | 1.1349660  | 0.9948110  |
| B | -1.2729110 | 1.4159800  | -0.2767770 |
| B | 0.0207000  | 0.6836480  | -1.1865150 |
| B | 0.0344490  | -1.0762780 | -1.2478810 |
| B | -1.5280070 | -0.1788360 | -0.9360590 |
| B | -1.5471700 | 0.0920410  | 0.8417340  |
| B | -0.0398860 | -0.5732870 | 1.4943140  |
| B | 0.8659650  | -1.4905600 | 0.2668580  |
| H | 1.8395990  | 2.4610300  | -0.2616940 |
| H | -1.5510370 | -2.4367650 | 0.3283180  |
| H | 2.4448710  | -0.3680890 | -1.6173780 |
| H | 2.4195110  | 0.2688800  | 1.6072450  |
| H | 0.0279680  | 2.1151140  | 1.6712310  |
| H | -1.7303590 | 2.4909260  | -0.4415160 |
| H | 0.4961650  | 1.7375460  | -1.6378070 |
| H | 0.0348740  | -1.6520960 | -2.2875210 |
| H | -2.3876070 | -0.3432630 | -1.7350210 |
| H | -2.4877950 | 0.2409250  | 1.5511160  |
| H | -0.0465810 | -0.7918160 | 2.6640690  |

H 1.4437560 -2.5074250 0.4619200

C

**CCSD(T)/def2-TZVP//TPSS/def2-TZVP**

**G = -304.58181 a.u.**

|   |            |            |            |
|---|------------|------------|------------|
| B | 0.3690690  | 0.8147220  | -1.4672610 |
| B | -0.3690690 | -0.8147220 | -1.4672610 |
| B | 0.4595190  | 0.7631240  | 1.4858500  |
| B | -0.4595190 | -0.7631240 | 1.4858500  |
| B | -1.3484530 | 0.5806140  | -0.9388240 |
| B | 1.3484530  | -0.5806140 | -0.9388240 |
| B | -1.4552350 | 0.5662280  | 0.8254670  |
| B | 1.4552350  | -0.5662280 | 0.8254670  |
| B | -0.2121900 | 1.5249060  | 0.0200420  |
| B | 1.4552350  | 0.9731790  | -0.0702750 |
| B | -1.4552350 | -0.9731790 | -0.0702750 |
| B | 0.2121900  | -1.5249060 | 0.0200420  |
| H | -2.2325900 | 1.0536270  | -1.5720630 |
| H | -0.3429630 | 2.5151400  | 0.7197570  |
| H | 0.5841090  | 1.4407190  | -2.4523430 |
| H | -0.5841090 | -1.4407190 | -2.4523430 |
| H | -2.3948840 | -1.6957520 | -0.0461790 |
| H | 0.3429630  | -2.5151400 | 0.7197570  |
| H | -0.7082440 | -1.2095180 | 2.5543840  |
| H | 2.3317040  | -0.9539260 | 1.5214560  |
| H | 0.7082440  | 1.2095180  | 2.5543840  |
| H | 2.3948840  | 1.6957520  | -0.0461790 |
| H | -2.3317040 | 0.9539260  | 1.5214560  |
| H | 2.2325900  | -1.0536270 | -1.5720630 |

D

**CCSD(T)/def2-TZVP//TPSS/def2-TZVP**

**G = -304.56931 a.u.**

|   |            |            |            |
|---|------------|------------|------------|
| B | 0.0000000  | 0.8439440  | -1.5140700 |
| B | -0.0000000 | -0.8439440 | -1.5140700 |
| B | -0.0000000 | 0.8439440  | 1.5140700  |
| B | 0.0000000  | -0.8439440 | 1.5140700  |
| B | -1.5140700 | 0.0000000  | -0.8439440 |
| B | 1.5140700  | 0.0000000  | -0.8439440 |
| B | -1.5140700 | 0.0000000  | 0.8439440  |
| B | 1.5140700  | -0.0000000 | 0.8439440  |

|   |            |            |            |
|---|------------|------------|------------|
| B | -0.8439440 | 1.5140700  | -0.0000000 |
| B | 0.8439440  | 1.5140700  | 0.0000000  |
| B | -0.8439440 | -1.5140700 | -0.0000000 |
| B | 0.8439440  | -1.5140700 | 0.0000000  |
| H | -2.5134330 | 0.0000000  | -1.4784110 |
| H | -1.4784110 | 2.5134330  | -0.0000000 |
| H | -0.0000000 | 1.4784110  | -2.5134330 |
| H | -0.0000000 | -1.4784110 | -2.5134330 |
| H | -1.4784110 | -2.5134330 | 0.0000000  |
| H | 1.4784110  | -2.5134330 | -0.0000000 |
| H | -0.0000000 | -1.4784110 | 2.5134330  |
| H | 2.5134330  | 0.0000000  | 1.4784110  |
| H | 0.0000000  | 1.4784110  | 2.5134330  |
| H | 1.4784110  | 2.5134330  | 0.0000000  |
| H | -2.5134330 | 0.0000000  | 1.4784110  |
| H | 2.5134330  | -0.0000000 | -1.4784110 |

## E

**CCSD(T)/def2-TZVP//TPSS/def2-TZVP**

**G = -304.56750 a.u.**

|   |            |            |            |
|---|------------|------------|------------|
| B | -0.0000000 | 0.8937550  | 1.5001240  |
| B | -0.0000000 | -0.8937550 | 1.5001240  |
| B | 0.0000000  | 0.8373790  | -1.5425060 |
| B | -0.0000000 | -0.8373790 | -1.5425060 |
| B | 1.4480980  | -0.0000000 | 0.9378860  |
| B | -1.4480980 | 0.0000000  | 0.9378860  |
| B | 1.5600520  | -0.0000000 | -0.8443990 |
| B | -1.5600520 | 0.0000000  | -0.8443990 |
| B | 0.8340870  | 1.4156380  | 0.0349150  |
| B | -0.8340870 | 1.4156380  | 0.0349150  |
| B | 0.8340870  | -1.4156380 | 0.0349150  |
| B | -0.8340870 | -1.4156380 | 0.0349150  |
| H | 2.4731030  | -0.0000000 | 1.5342930  |
| H | 1.5621820  | 2.2895530  | -0.3613480 |
| H | -0.0000000 | 1.5256600  | 2.5032970  |
| H | -0.0000000 | -1.5256600 | 2.5032970  |
| H | 1.5621820  | -2.2895530 | -0.3613480 |
| H | -1.5621820 | -2.2895530 | -0.3613480 |
| H | 0.0000000  | -1.5660570 | -2.4748660 |
| H | -2.5758830 | 0.0000000  | -1.4446960 |
| H | 0.0000000  | 1.5660570  | -2.4748660 |
| H | -1.5621820 | 2.2895530  | -0.3613480 |
| H | 2.5758830  | -0.0000000 | -1.4446960 |

|   |            |           |           |
|---|------------|-----------|-----------|
| H | -2.4731030 | 0.0000000 | 1.5342930 |
|---|------------|-----------|-----------|

**F**

**CCSD(T)/def2-TZVP//TPSS/def2-TZVP**

**G = -304.54697 a.u.**

|   |            |            |            |
|---|------------|------------|------------|
| B | -0.6847040 | 1.5659780  | 0.0000000  |
| B | 0.7458170  | 1.1507240  | 0.9295540  |
| B | 0.6847040  | -1.5659780 | 0.0000000  |
| B | 0.7458170  | -0.4831450 | 1.5169900  |
| B | 0.7458170  | 1.1507240  | -0.9295540 |
| B | 1.7090800  | 0.0143410  | -0.0000000 |
| B | -0.7458170 | -1.1507240 | -0.9295540 |
| B | 0.7458170  | -0.4831450 | -1.5169900 |
| B | -1.7090800 | -0.0143410 | -0.0000000 |
| B | -0.7458170 | 0.4831450  | 1.5169900  |
| B | -0.7458170 | -1.1507240 | 0.9295540  |
| B | -0.7458170 | 0.4831450  | -1.5169900 |
| H | 1.3582930  | -0.8803420 | -2.4511420 |
| H | -1.3582930 | 0.8803420  | -2.4511420 |
| H | 1.3649380  | 2.1054500  | -1.3214930 |
| H | 2.8630610  | -0.2701070 | -0.0000000 |
| H | 1.4146460  | -2.5038910 | -0.0000000 |
| H | 1.3582930  | -0.8803420 | 2.4511420  |
| H | -1.3649380 | -2.1054500 | 1.3214930  |
| H | -1.3582930 | 0.8803420  | 2.4511420  |
| H | -2.8630610 | 0.2701070  | -0.0000000 |
| H | -1.4146460 | 2.5038910  | -0.0000000 |
| H | -1.3649380 | -2.1054500 | -1.3214930 |
| H | 1.3649380  | 2.1054500  | 1.3214930  |

**G**

**CCSD(T)/def2-TZVP//TPSS/def2-TZVP**

**G = -304.54638 a.u.**

|   |            |            |            |
|---|------------|------------|------------|
| B | 0.0000000  | 1.4263050  | 0.9418260  |
| B | -0.9296480 | 0.0000000  | 1.3711780  |
| B | -0.0000000 | -1.4263050 | -0.9418260 |
| B | -1.5169670 | -0.8886890 | 0.0000000  |
| B | 0.9296480  | -0.0000000 | 1.3711780  |
| B | -0.0000000 | -1.4263050 | 0.9418260  |
| B | 0.9296480  | 0.0000000  | -1.3711780 |
| B | 1.5169670  | -0.8886890 | 0.0000000  |
| B | 0.0000000  | 1.4263050  | -0.9418260 |



|   |            |            |            |
|---|------------|------------|------------|
| B | -1.5169670 | 0.8886890  | 0.0000000  |
| B | -0.9296480 | 0.0000000  | -1.3711780 |
| B | 1.5169670  | 0.8886890  | 0.0000000  |
| H | 2.4511030  | -1.6187010 | 0.0000000  |
| H | 2.4511030  | 1.6187010  | 0.0000000  |
| H | 1.3215700  | -0.0000000 | 2.5090840  |
| H | 0.0000000  | -2.5491410 | 1.3314220  |
| H | 0.0000000  | -2.5491410 | -1.3314220 |
| H | -2.4511030 | -1.6187010 | -0.0000000 |
| H | -1.3215700 | -0.0000000 | -2.5090840 |
| H | -2.4511030 | 1.6187010  | 0.0000000  |
| H | 0.0000000  | 2.5491410  | -1.3314220 |
| H | 0.0000000  | 2.5491410  | 1.3314220  |
| H | 1.3215700  | 0.0000000  | -2.5090840 |
| H | -1.3215700 | 0.0000000  | 2.5090840  |

**H**

**CCSD(T)/def2-TZVP//TPSS/def2-TZVP**

**G = -304.54549 a.u.**

|   |            |            |            |
|---|------------|------------|------------|
| B | -0.7671140 | 0.7198640  | -1.3545340 |
| B | 1.1042730  | 0.3678870  | -1.2602800 |
| B | 0.7671140  | -0.7198640 | 1.3545340  |
| B | 1.5562960  | 0.5527300  | 0.4092710  |
| B | -0.1359560 | -1.0790980 | -1.3260810 |
| B | 1.2817310  | -1.0861270 | -0.2659230 |
| B | -1.1042730 | -0.3678870 | 1.2602800  |
| B | -0.3244770 | -1.6411450 | 0.3087890  |
| B | -1.2817310 | 1.0861270  | 0.2659230  |
| B | 0.3244770  | 1.6411450  | -0.3087890 |
| B | 0.1359560  | 1.0790980  | 1.3260810  |
| B | -1.5562960 | -0.5527300 | -0.4092710 |
| H | -0.5502470 | -2.8114100 | 0.4266750  |
| H | -2.6712330 | -0.9468240 | -0.5986300 |
| H | -0.1666220 | -1.5353570 | -2.4239360 |
| H | 2.1904730  | -1.8613880 | -0.3530290 |
| H | 1.0656820  | -1.0260800 | 2.4642410  |
| H | 2.6712330  | 0.9468240  | 0.5986300  |
| H | 0.1666220  | 1.5353570  | 2.4239360  |
| H | 0.5502470  | 2.8114100  | -0.4266750 |
| H | -2.1904730 | 1.8613880  | 0.3530290  |
| H | -1.0656820 | 1.0260800  | -2.4642410 |
| H | -1.5997150 | -0.5248080 | 2.3299570  |
| H | 1.5997150  | 0.5248080  | -2.3299570 |
